# Supplementary material for: The transcription factor Ets21C drives tumor growth by cooperating with AP-1
Source: PubMed Central journal article supplement (PMC5054425; doi:10.1038/srep34725), 2016-10-07
Supplement: srep34725-s1.pdf [file srep34725-s1.pdf]

# The transcription factor *Ets21C* drives tumor growth by cooperating with AP-1

Janine Toggweiler<sup>1</sup>, Maria Willecke<sup>1,2</sup> and Konrad Basler<sup>1\*</sup>

<sup>1</sup> Institute of Molecular Life Sciences, University of Zurich, Zurich, Switzerland

<sup>2</sup> Present address: Neural Control of Movement Laboratory, Department of Health Sciences and Technology, ETH Zurich, Zurich, Switzerland

## Supplementary Information

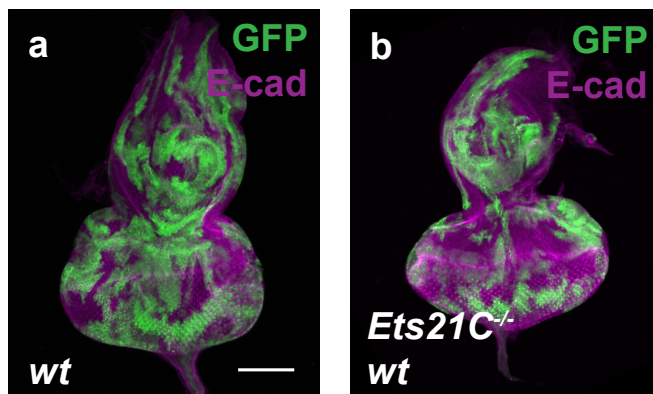

### Supplementary Figure 1: A loss of *Ets21C* does not affect normal cells

(a) and (b) Discs contain *ey-FLP* induced MARCM clones<sup>34</sup> that are positively labeled with GFP (green). Additionally, discs are stained for E-cadherin (E-cad) to visualize cell outlines (magenta). (a) Wild-type clones, (b) Clones homozygous mutant for *Ets21C*. Scale bar: 100 $\mu$ m.

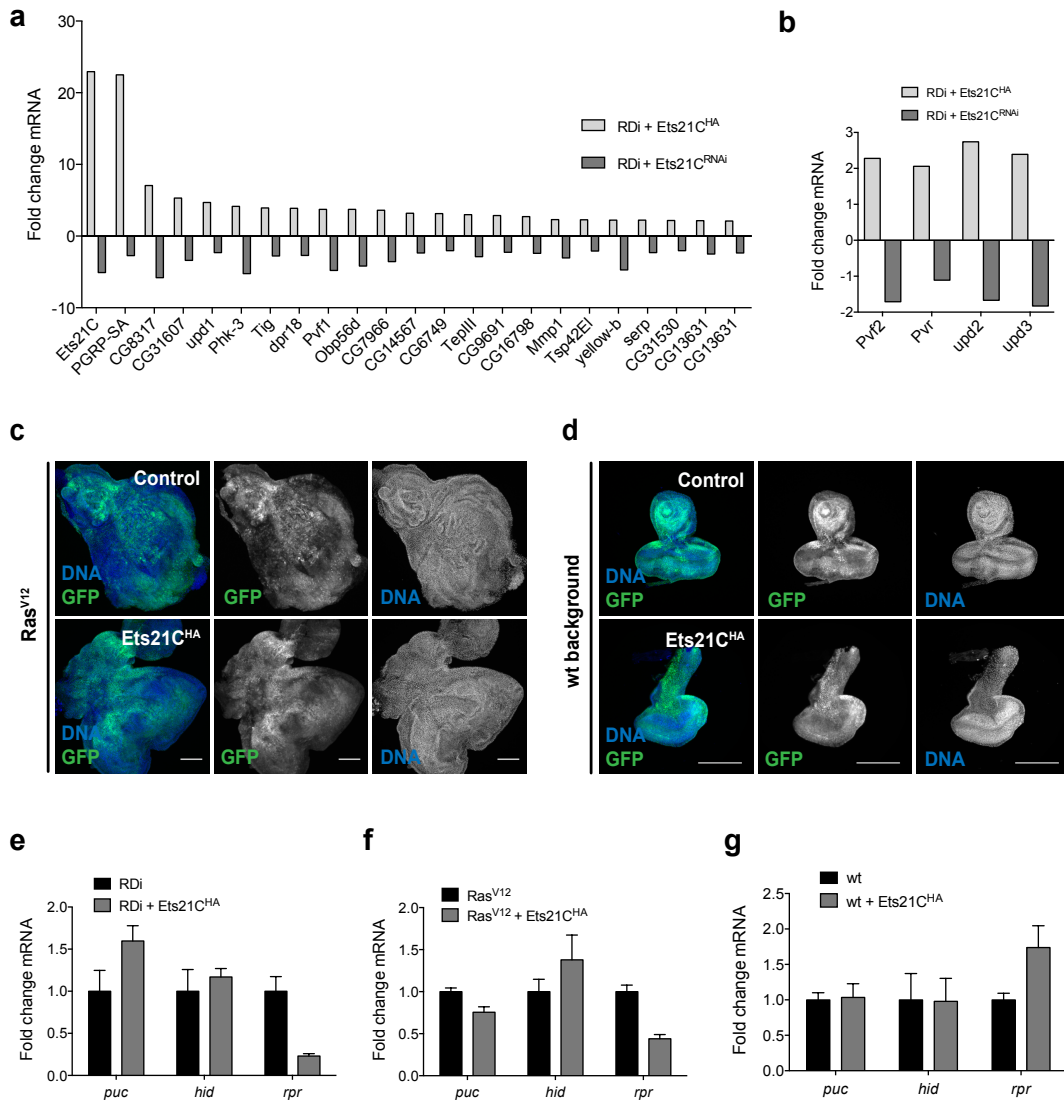

## Supplementary Figure 2: Gene expression changes upon Ets21C overexpression or depletion

- (a) 22 genes that are significantly (fold change  $\geq 2$ ) upregulated upon Ets21C overexpression and downregulated with *Ets21C<sup>RNAi</sup>* in *Ras<sup>V12</sup> dlg<sup>RNAi</sup>* tumors (*RDi*).
- (b) Differential expression of additional *Pvfs* and *upd* genes upon changes in *Ets21C* levels. (c) Confocal images of control *Ras<sup>V12</sup>* tumors (upper) or *Ras<sup>V12</sup>* tumors expressing Ets21C (lower). Scale bar: 100 $\mu$ m. (d) Confocal images of wild-type eye discs (upper) or eye discs overexpressing Ets21C (lower). Scale bar: 200 $\mu$ m. (e) - (g)

qRT-PCRs to detect *puc*, *hid* or *rpr* transcripts of dissected tumors (e) and (f) or wild-type eye discs (g) with the indicated genotypes. *puc*, *hid* or *rpr* expression did not change substantially upon Ets21C overexpression. Error bars indicate SD.
